# Supplementary material for: Dicarboxylic Acid-Based Co-Crystals of Pyridine Derivatives Involving Structure Guiding Unconventional Synthons: Experimental and Theoretical Studies
Source: MDPI journal article supplement (doi:10.3390/cryst12101442), 2022-10-12
Supplement: s1 [file s1]

# **Dicarboxylic Acid-based Co-crystals of Pyridine Derivatives involving Structure guiding Unconventional Synthons: Experimental and Theoretical Studies**

Pranay Sharma<sup>1</sup>, Rosa M. Gomila<sup>2</sup>, Antonio Frontera<sup>\*2</sup>, Miquel Barcelo-Oliver<sup>2</sup>, Manjit K. Bhattacharyya<sup>\*1</sup>

<sup>1</sup>*Department of Chemistry, Cotton University, Guwahati-781001, Assam, India*

<sup>2</sup>*Departament de Química, Universitat de les Illes Balears, Crta de Valldemossa km 7.7, 07122 Palma de Mallorca (Balears), Spain*

*\*Corresponding authors E-mail: [manjit.bhattacharyya@cottonuniversity.ac.in](mailto:manjit.bhattacharyya@cottonuniversity.ac.in)  
[toni.frontera@uib.es](mailto:toni.frontera@uib.es)*

### Supplementary Information

**Table S1.** Comparison of crystal parameters of compound **1** with the already reported compound

| Crystal Parametres                                                        | Compound <b>1</b>                                           | CCDC <b>1453483</b>                                           |
|---------------------------------------------------------------------------|-------------------------------------------------------------|---------------------------------------------------------------|
| Emprical formula                                                          | C <sub>7</sub> H <sub>5</sub> N <sub>2</sub> O <sub>2</sub> | C <sub>14</sub> H <sub>10</sub> N <sub>4</sub> O <sub>4</sub> |
| Formula weight                                                            | 149.13                                                      | 298.26                                                        |
| Temperature (K)                                                           | 100.0                                                       | 173(2)                                                        |
| Crystal system                                                            | Monoclinic                                                  | Monoclinic                                                    |
| Space group                                                               | <i>P</i> 2 <sub>1</sub> / <i>c</i>                          | <i>P</i> 2 <sub>1</sub> / <i>c</i>                            |
| <i>a</i> /Å                                                               | 3.664(2)                                                    | 3.7569(17)                                                    |
| <i>b</i> /Å                                                               | 13.887(8)                                                   | 13.997(6)                                                     |
| <i>c</i> /Å                                                               | 13.455(6)                                                   | 13.549(7)                                                     |
| $\alpha$ °                                                                | 90                                                          | 90                                                            |
| $\beta$ °                                                                 | 91.55(2)                                                    | 91.97(3)                                                      |
| $\gamma$ °                                                                | 90                                                          | 90                                                            |
| Volume (Å <sup>3</sup> )                                                  | 684.5(6)                                                    | 712.0(6)                                                      |
| <i>Z</i>                                                                  | 4                                                           | 2                                                             |
| Calculated density (Mgm <sup>-3</sup> )                                   | 1.447                                                       | 1.391                                                         |
| Absorption coefficient (mm <sup>-1</sup> )                                | 0.927                                                       | 0.106                                                         |
| F(000)                                                                    | 908                                                         | 308                                                           |
| Crystal size (mm <sup>3</sup> )                                           | 0.49 × 0.20 × 0.19                                          | 0.20×0.10×0.10                                                |
| $\theta$ range for data collection(°)                                     | 6.378 to 66.541                                             | 3.277 to 24.984                                               |
| Index ranges                                                              | -3 ≤ <i>h</i> ≤ 4, -16 ≤ <i>k</i> ≤ 16, -16 ≤ <i>l</i> ≤ 16 | -4≤ <i>h</i> ≤4,<br>-16≤ <i>k</i> ≤16,<br>-16≤ <i>l</i> ≤16   |
| Reflections collected                                                     | 1166                                                        | 1256                                                          |
| Independent reflections                                                   | 1114                                                        | 942                                                           |
| Refinement method                                                         | Full-matrix least squares on <i>F</i> <sup>2</sup>          | Full-matrix least-squares on <i>F</i> <sup>2</sup>            |
| Data / restraints / parameters                                            | 1166/0/105                                                  | 1256/0/105                                                    |
| Goodness-of-fit on <i>F</i> <sup>2</sup>                                  | 1.088                                                       | 1.043                                                         |
| Final <i>R</i> indices[ <i>I</i> >2σ( <i>I</i> )] <i>R</i> 1/ <i>wR</i> 2 | 0.0433/0.1140                                               | 0.0654/0.1606                                                 |
| <i>R</i> indices(all data) <i>R</i> 1/ <i>wR</i> 2                        | 0.0449/0.1153                                               | 0.0858/0.1763                                                 |

**Table S2.** Comparison of crystal parameters of compound **2** with the already reported compound

| Crystal Parametres                                                        | Compound <b>2</b>                                             | CCDC <b>1453486</b>                                           |
|---------------------------------------------------------------------------|---------------------------------------------------------------|---------------------------------------------------------------|
| Emprical formula                                                          | C <sub>18</sub> H <sub>18</sub> N <sub>4</sub> O <sub>4</sub> | C <sub>18</sub> H <sub>18</sub> N <sub>4</sub> O <sub>4</sub> |
| Formula weight                                                            | 354.36                                                        | 354.36                                                        |
| Temperature (K)                                                           | 100.0                                                         | 293(2)                                                        |
| Crystal system                                                            | Triclinic                                                     | Triclinic                                                     |
| Space group                                                               | <i>P</i> $\bar{1}$                                            | <i>P</i> $\bar{1}$                                            |
| <i>a</i> /Å                                                               | 3.8849(3)                                                     | 3.9764(3)                                                     |
| <i>b</i> /Å                                                               | 10.5878(9)                                                    | 10.5803(10)                                                   |
| <i>c</i> /Å                                                               | 11.7569(10)                                                   | 11.7777(13)                                                   |
| $\alpha$ °                                                                | 63.760(4)                                                     | 64.472(10)                                                    |
| $\beta$ °                                                                 | 86.193(5)                                                     | 85.454(7)                                                     |
| $\gamma$ °                                                                | 85.953(5)                                                     | 86.796(7)                                                     |
| Volume (Å <sup>3</sup> )                                                  | 432.34(6)                                                     | 445.60(8)                                                     |
| <i>Z</i>                                                                  | 1                                                             | 1                                                             |
| Calculated density (Mgm <sup>-3</sup> )                                   | 1.361                                                         | 1.321                                                         |
| Absorption coefficient (mm <sup>-1</sup> )                                | 0.818                                                         | 0.096                                                         |
| F(000)                                                                    | 186                                                           | 186                                                           |
| Crystal size (mm <sup>3</sup> )                                           | 0.45 × 0.39 × 0.33                                            | 0.20×0.10×0.10                                                |
| $\theta$ range for data collection(°)                                     | 8.39 to 134.446                                               | 3.5 to 14.8                                                   |
| Index ranges                                                              | -4 ≤ <i>h</i> ≤ 3, -12 ≤ <i>k</i> ≤ 12, -14 ≤ <i>l</i> ≤ 13   | -4≤ <i>h</i> ≤4,<br>-11≤ <i>k</i> ≤12,<br>-13≤ <i>l</i> ≤13   |
| Reflections collected                                                     | 5081                                                          | 1547                                                          |
| Independent reflections                                                   | 1541                                                          | 1235                                                          |
| Refinement method                                                         | Full-matrix least squares on F <sup>2</sup>                   | Full-matrix least-squares on F <sup>2</sup>                   |
| Data / restraints / parameters                                            | 1541/0/119                                                    | 1571/0/122                                                    |
| Goodness-of-fit on F <sup>2</sup>                                         | 1.063                                                         | 1.045                                                         |
| Final <i>R</i> indices[ <i>I</i> >2σ( <i>I</i> )] <i>R</i> 1/ <i>wR</i> 2 | 0.0479/0.1327                                                 | 0.0488/ 0.1310                                                |
| <i>R</i> indices(all data) <i>R</i> 1/ <i>wR</i> 2                        | 0.0539/0.1376                                                 | 0.0610/ 0.1451                                                |

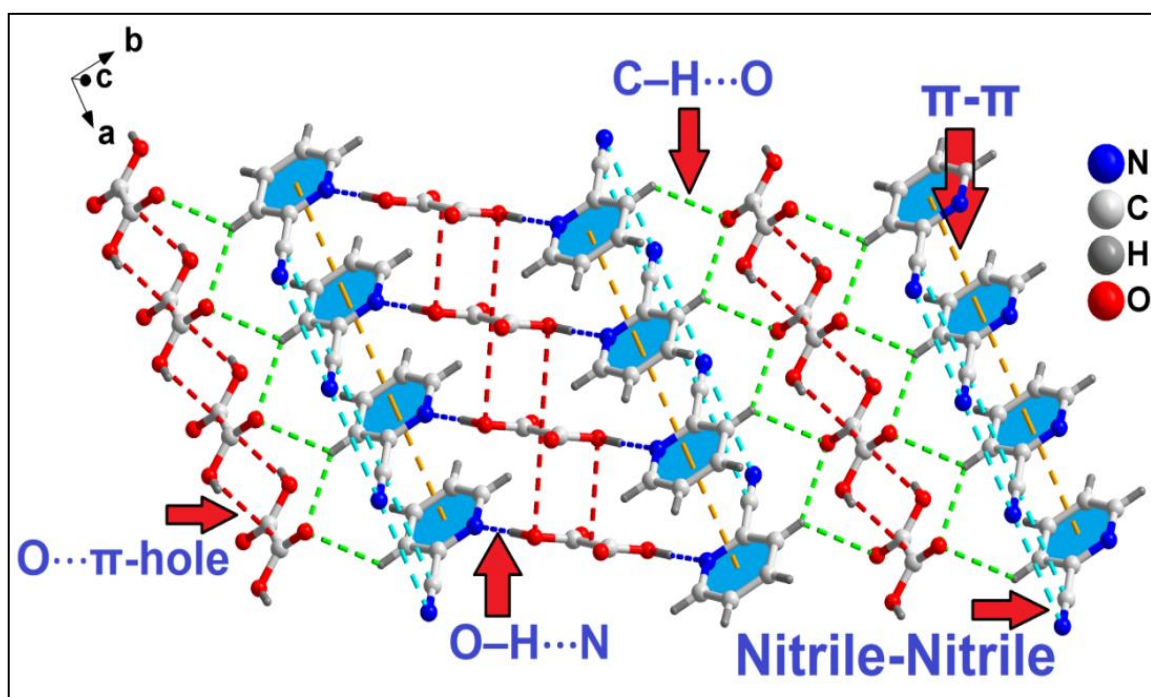

**Figure S1.** Layered assembly of **1** along the crystallographic *ab* plane assisted by unconventional  $\text{O} \cdots \pi$ -hole, unusual parallel nitrile-nitrile,  $\pi$ -stacking,  $\text{O}-\text{H} \cdots \text{N}$  and  $\text{C}-\text{H} \cdots \text{O}$  hydrogen bonding interactions.

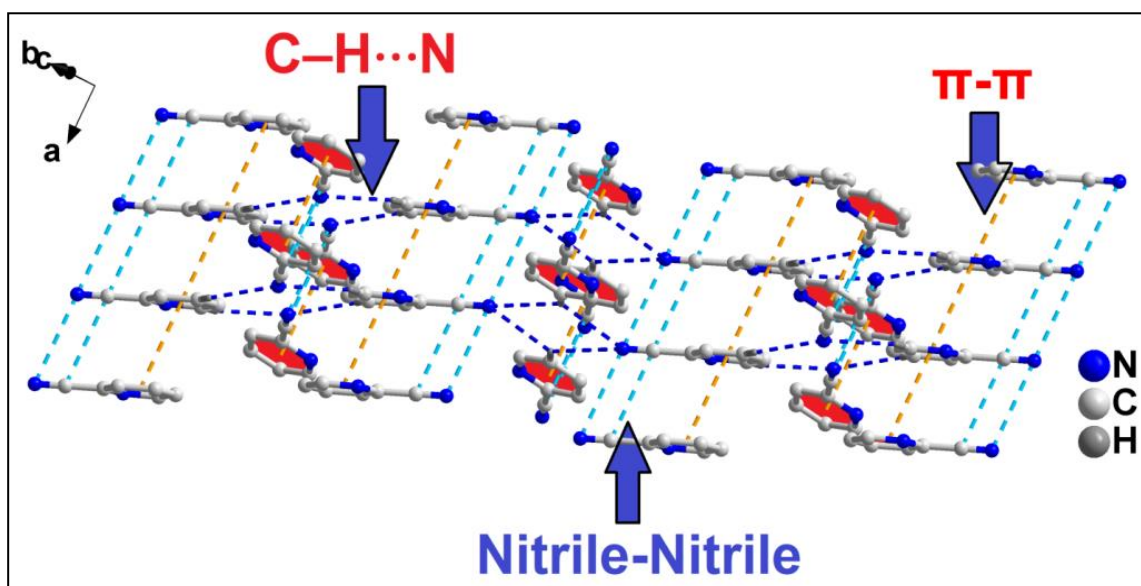

**Figure S2.** Layered assembly of **1** along the crystallographic *ac* plane.

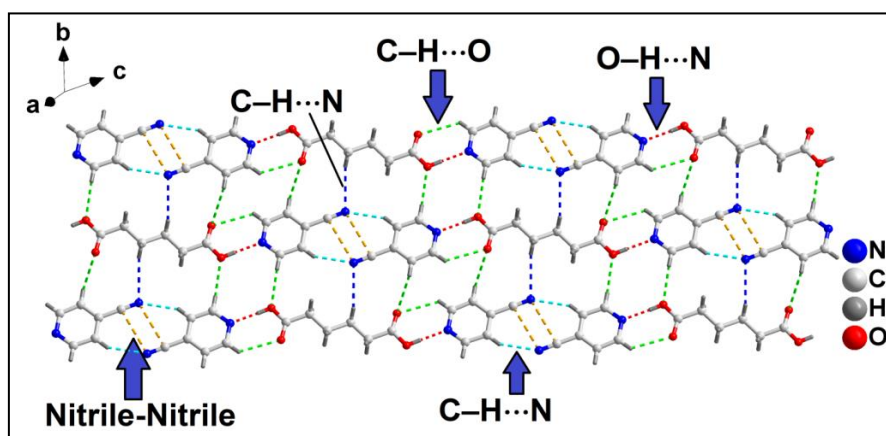

**Figure S3.** Layered assembly of **2** assisted by nitrile-nitrile, C–H...N, O–H...N and C–H...O hydrogen bonding interactions

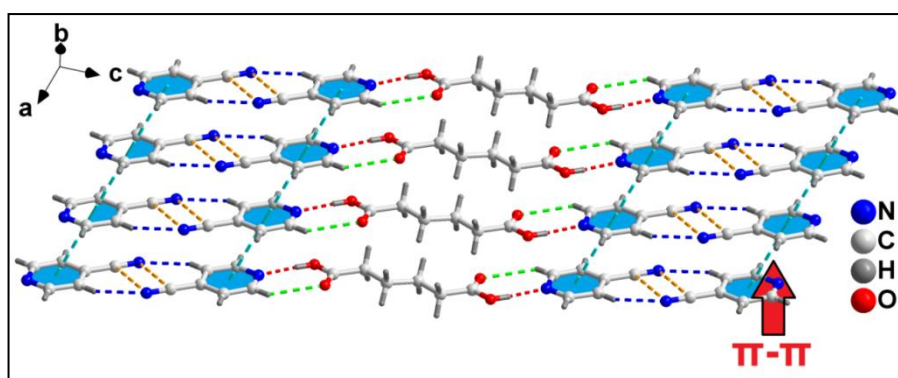

**Figure S4.** Layered architecture of **2** along the crystallographic *ac* plane assisted by aromatic  $\pi$ -stacking interaction.

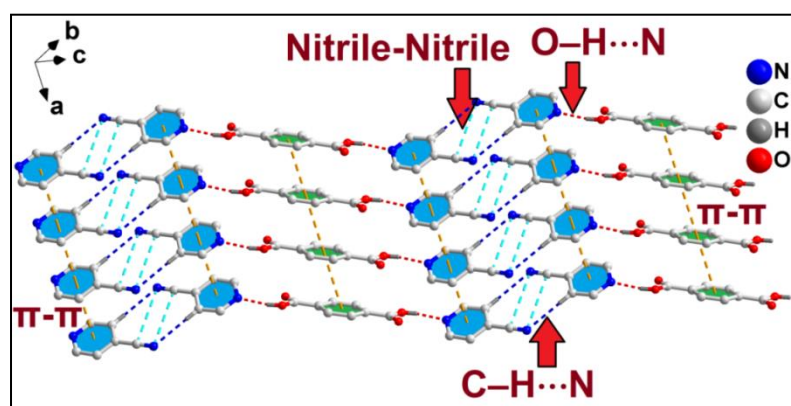

**Figure S5.** Layered assembly of co-crystal **3** along the crystallographic *ac* plane assisted by antiparallel nitrile-nitrile, aromatic  $\pi$ -stacking, C–H...N and O–H...N hydrogen bonding interactions.

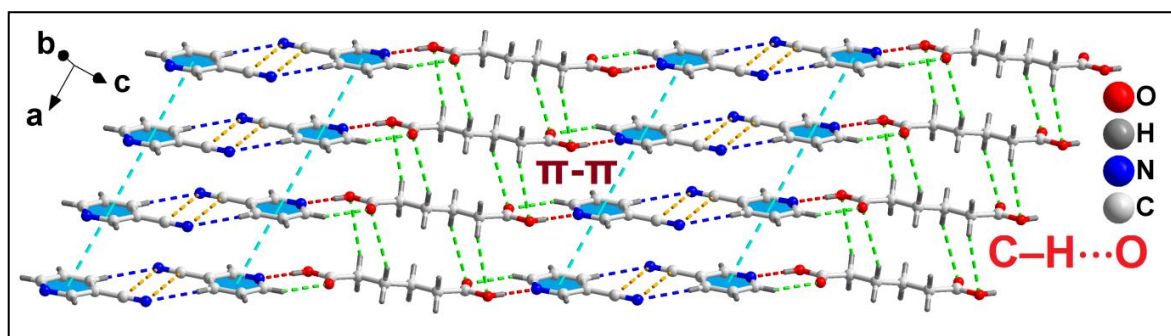

**Figure S6.** Layered assembly of co-crystal **4** along the crystallographic *ac* plane.
